# Supplementary material
Source: MDPI journal article supplement (https://www.mdpi.com/2073-4433/10/11/675)
Supplement: s1 [file s1]

Supplementary Materials

| **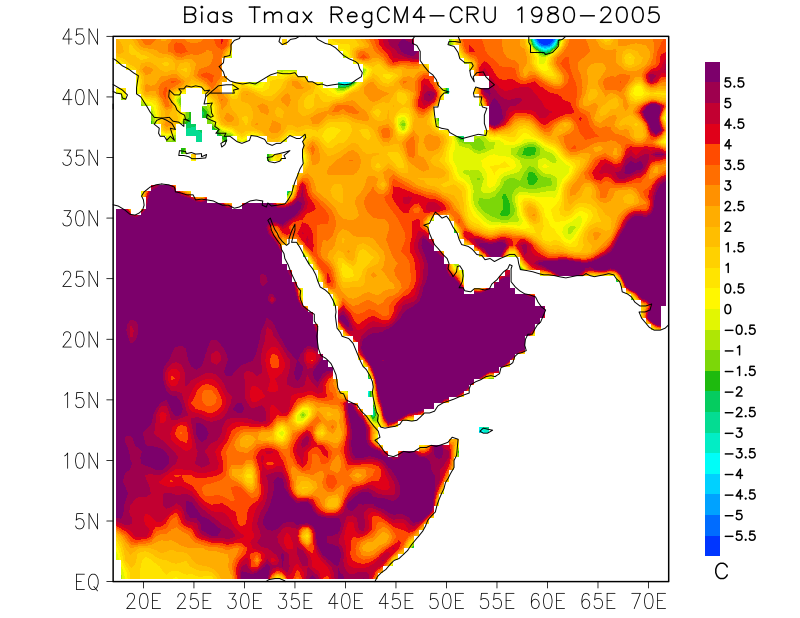** | **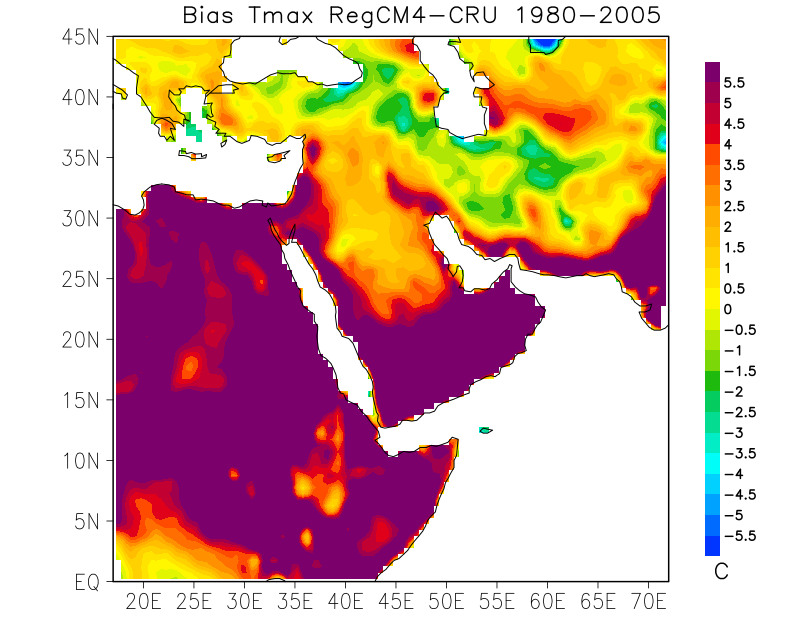** |
| --- | --- |
| 1. ERA-Int BATS | 1. ERA-Int CLM |
| 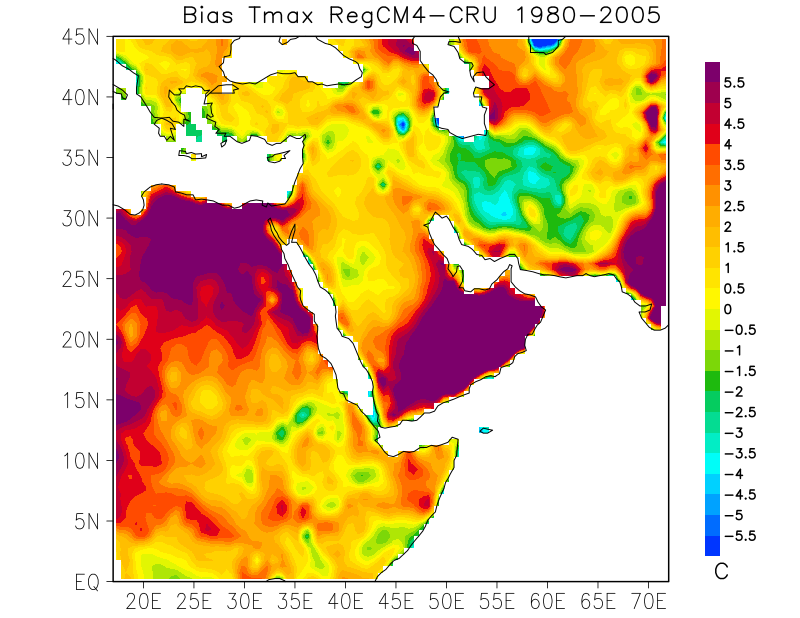 | 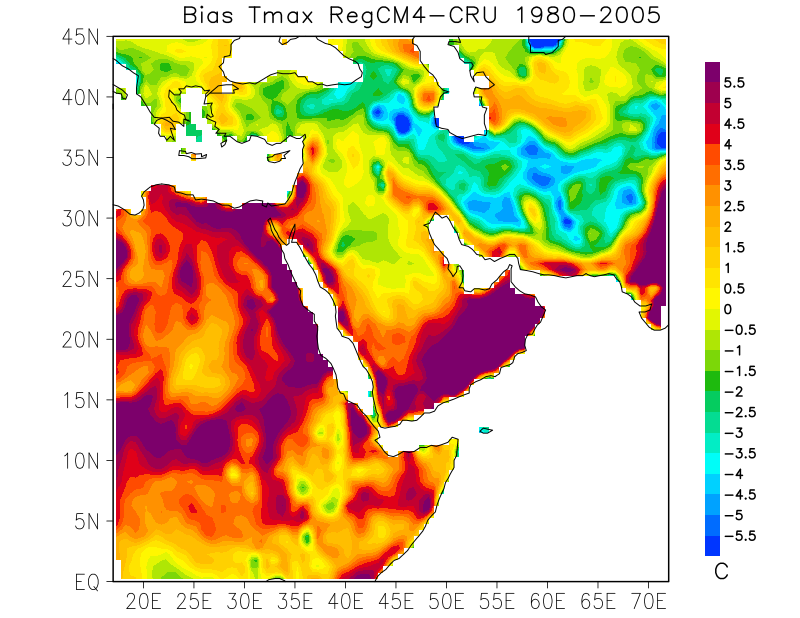 |
| 1. ECHAM BATS | 1. ECHAM CLM |
| 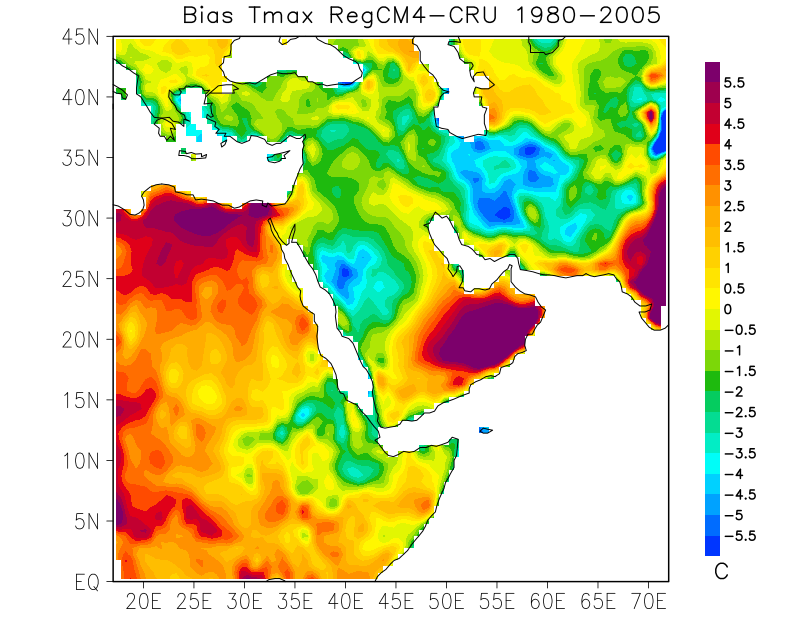 | 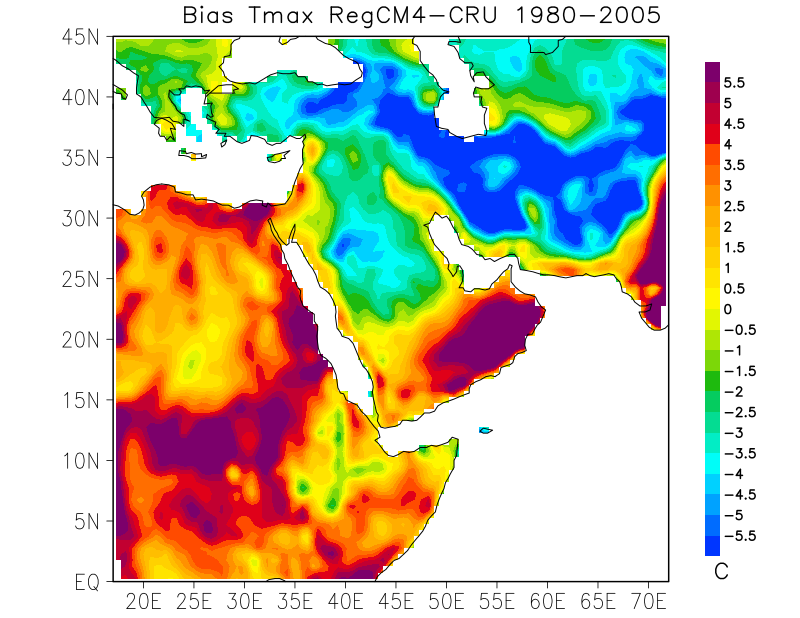 |
| 1. GFDL BATS | 1. GFDL CLM |
| 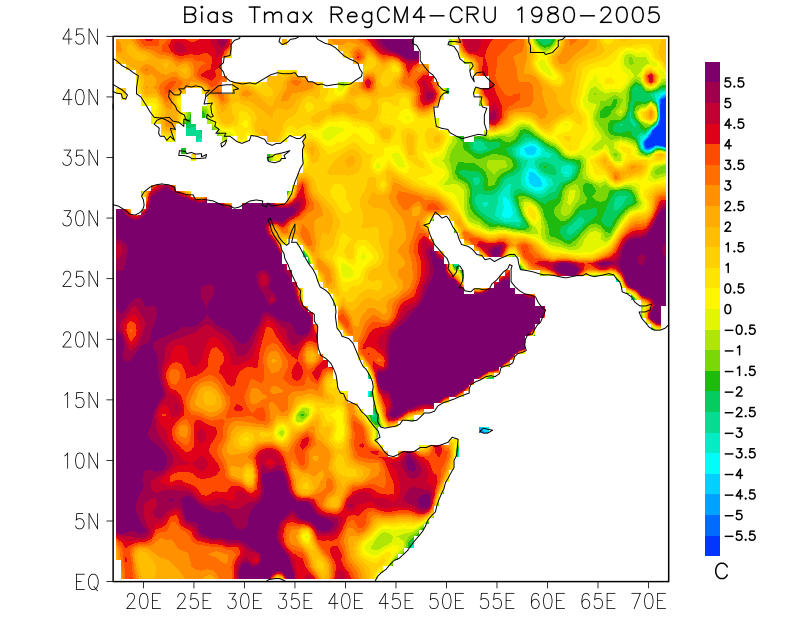 | 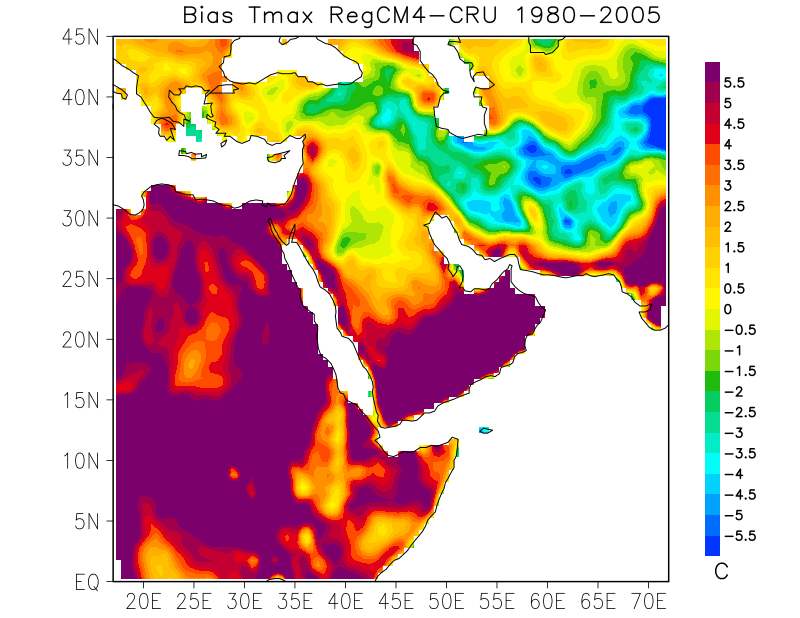 |
| 1. HadGEM BATS | 1. HadGEM CLM |

**Figure S1.** Spatial distribution of maximum temperature bias (C°) with reference to the CRU data for (**a**) ERA-Int BATS, (**b**) ERA-Int CLM, (**c**) ECHAM6 BATS, (**d**) ECHAM6 CLM, (**e**) GFDL BATS, (**f**) GFDL CLM, (**g**) HadGEM BATS, and (**h**) HadGEM CLM averaged over the period 1980-2005.

| 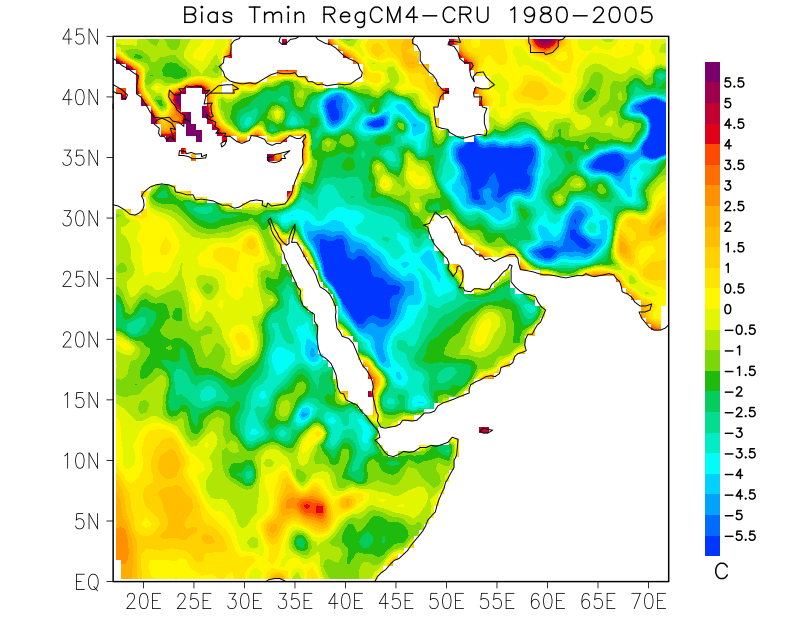 | 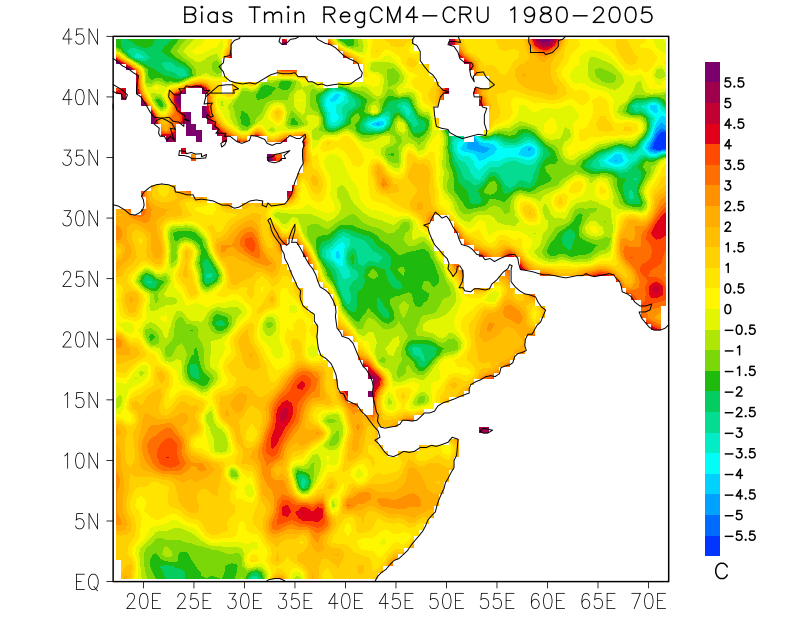 |
| --- | --- |
| 1. ERA-Int BATS | 1. ERA-Int CLM |
| 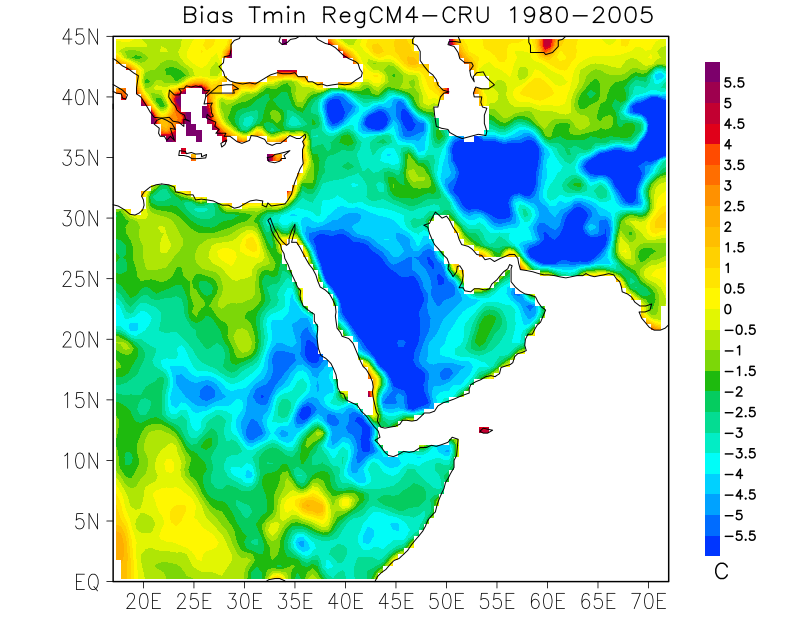 | 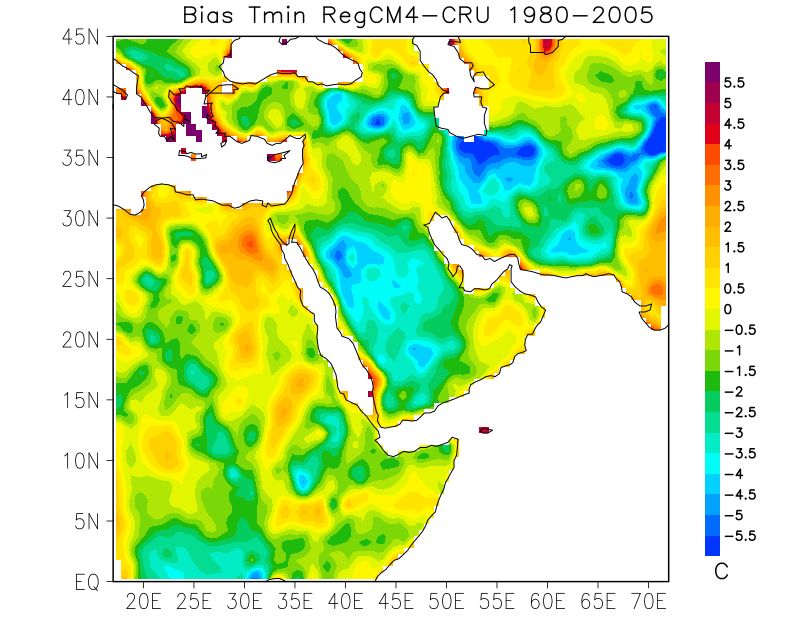 |
| 1. ECHAM BATS | 1. ECHAM CLM |
| 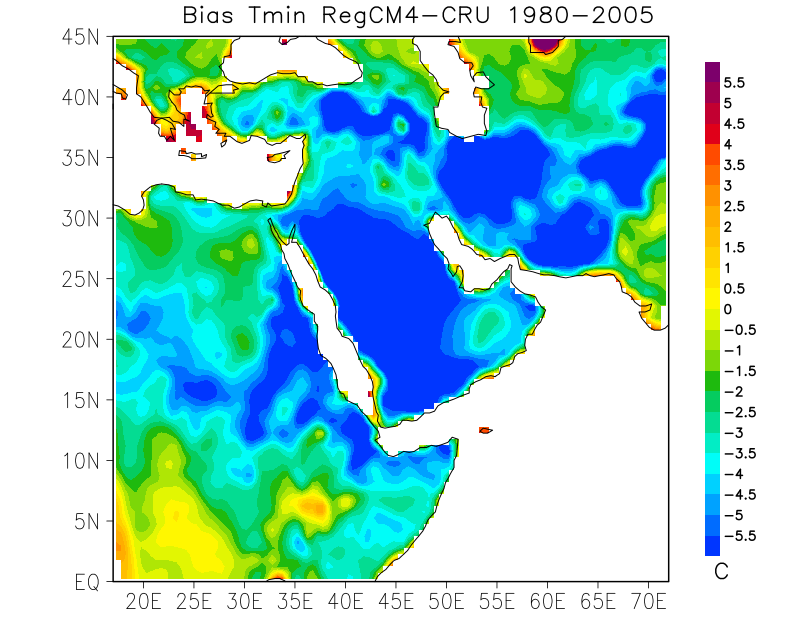 | 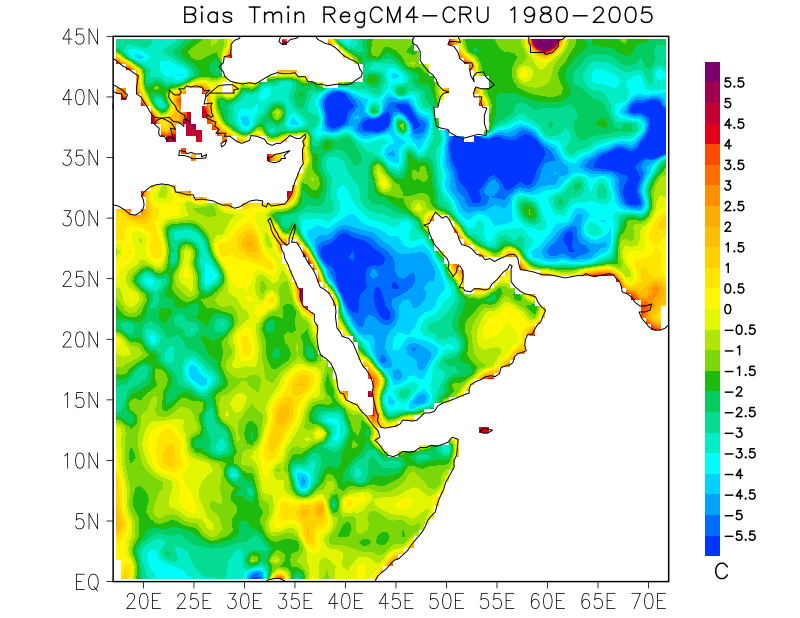 |
| 1. GFDL BATS | 1. GFDL CLM |
| 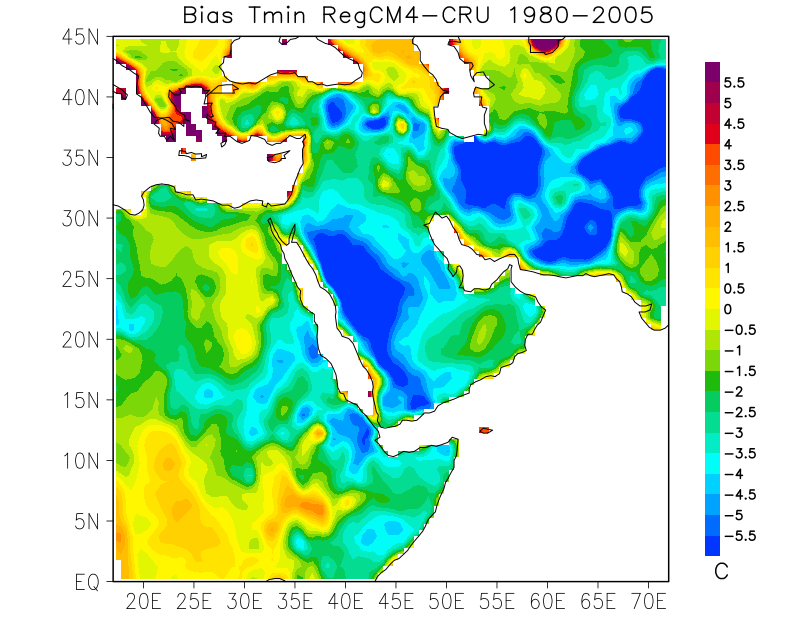 | 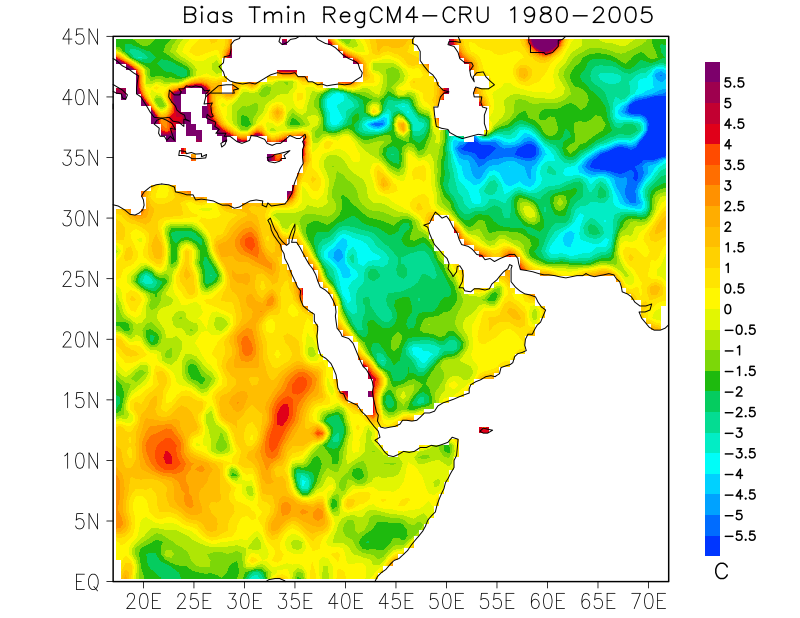 |
| 1. HadGEM BATS | 1. HadGEM CLM |

**Figure S2.** Spatial distribution of minimum temperature bias (C°) with reference to the CRU data for (**a**) ERA-Int BATS, (**b**) ERA-Int CLM, (**c**) ECHAM6 BATS, (**d**) ECHAM6 CLM, (**e**) GFDL BATS, (**f**) GFDL CLM, (**g**) HadGEM BATS, and (**h**) HadGEM CLM averaged over the period 1980-2005.

| 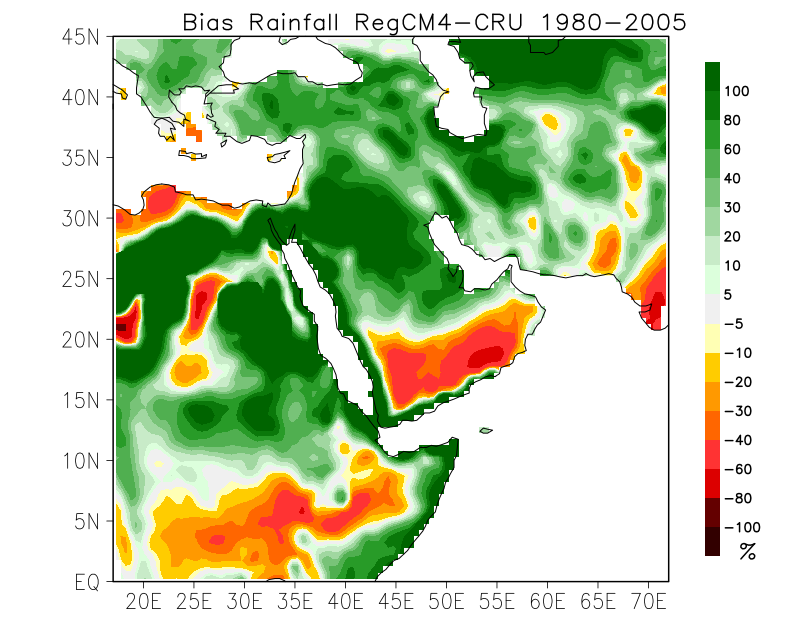 | 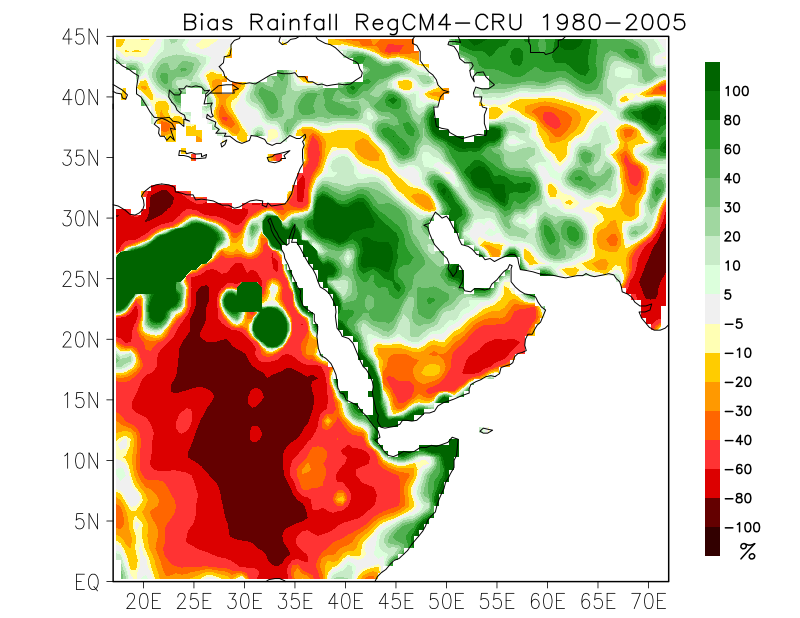 |
| --- | --- |
| 1. ERA-Int BATS | 1. ERA-Int CLM |
| 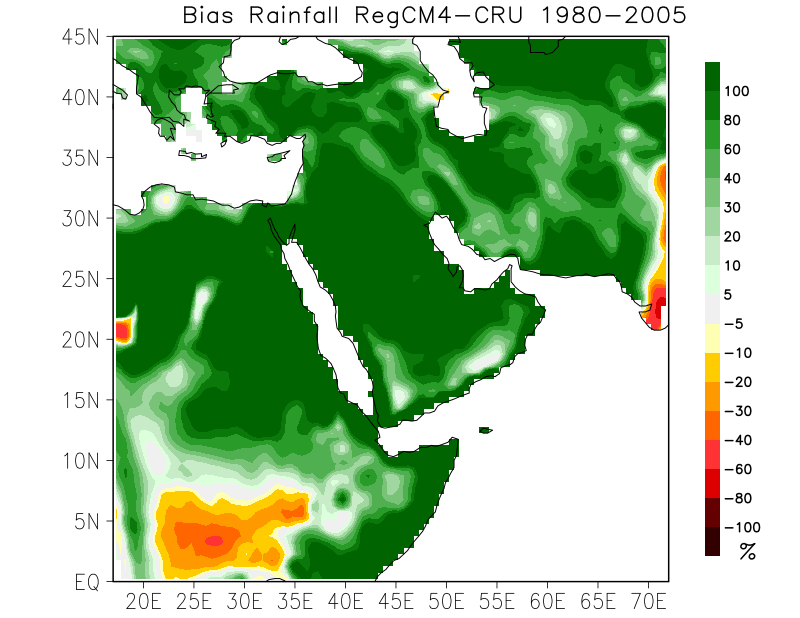 | 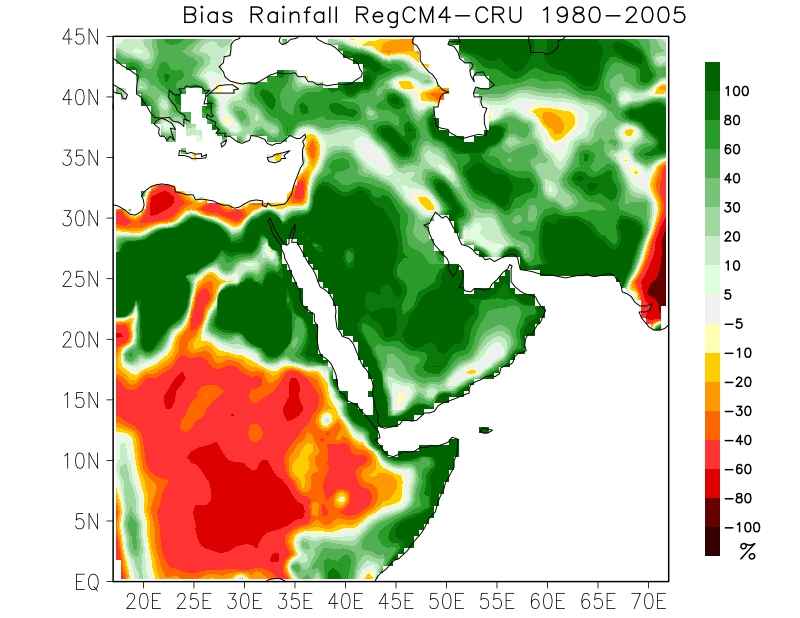 |
| 1. ECHAM BATS | 1. ECHAM CLM |
| 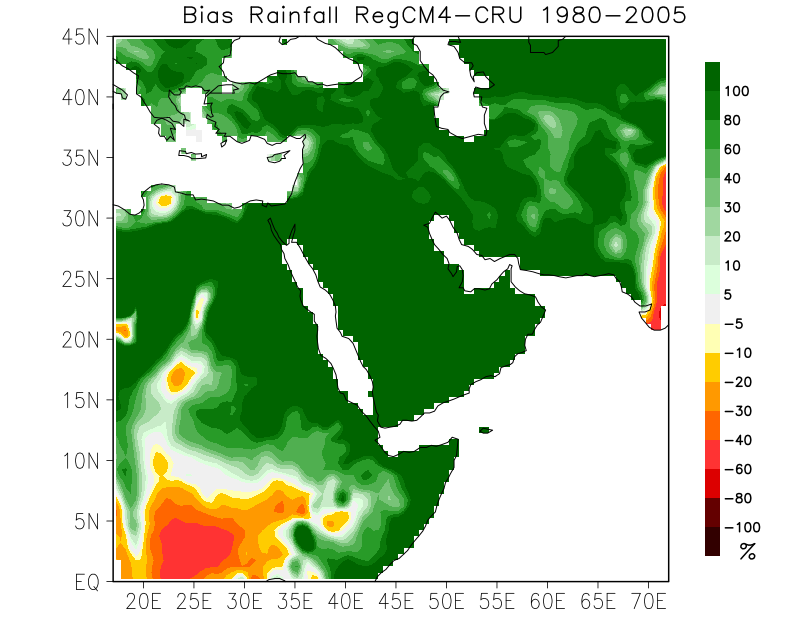 | 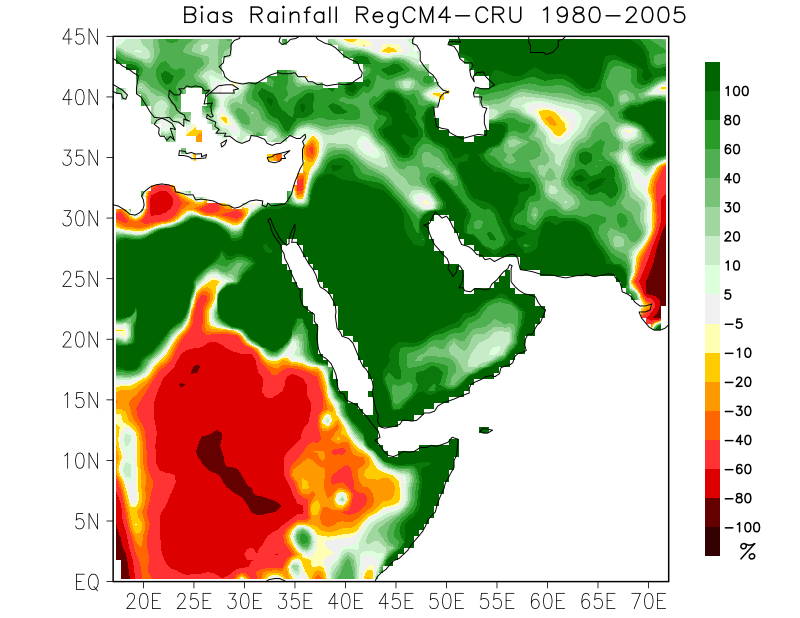 |
| 1. GFDL BATS | 1. GFDL CLM |
| 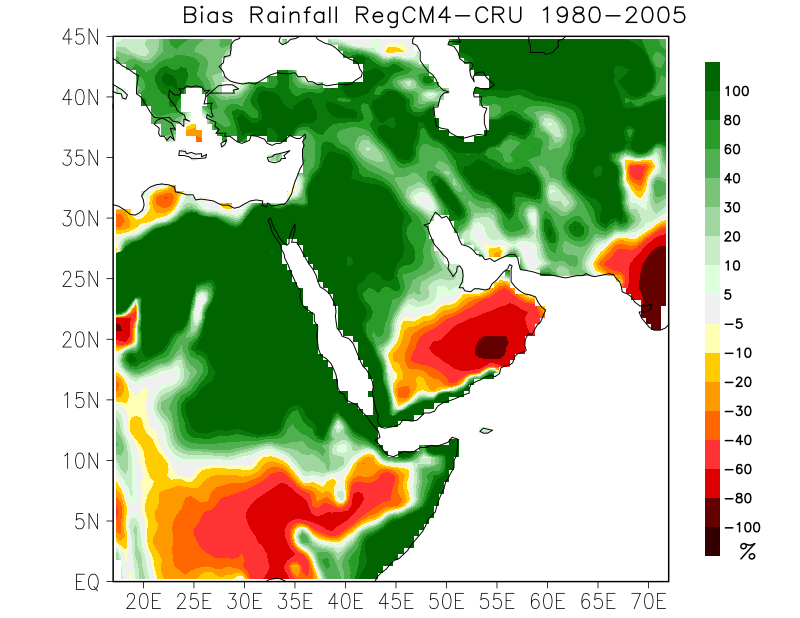 | 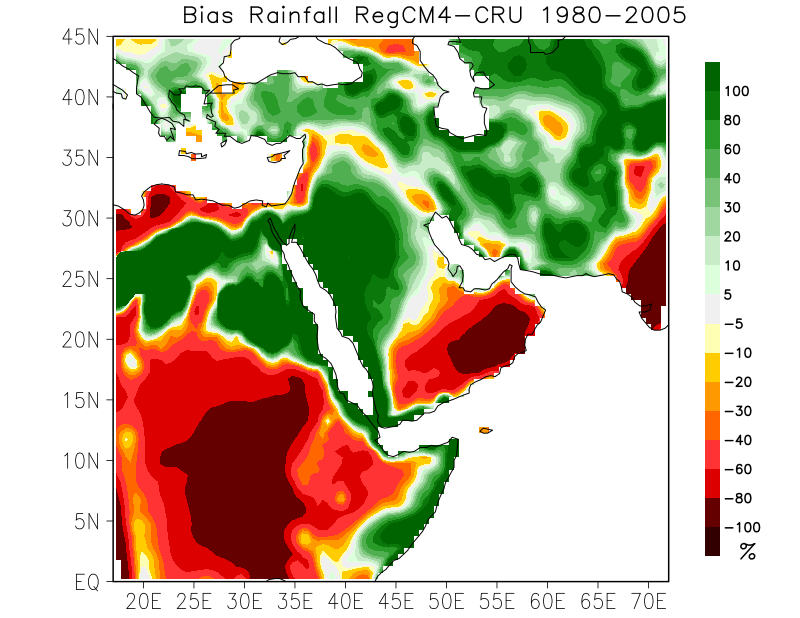 |
| 1. HadGEM BATS | 1. HadGEM CLM |
|  |  |

**Figure S3.** Spatial distribution of precipitation bias (%) with reference to the CRU data for (**a**) ERA-Int BATS, (**b**) ERA-Int CLM, (**c**) ECHAM6 BATS, (**d**) ECHAM6 CLM, (**e**) GFDL BATS, (**f**) GFDL CLM, (**g**) HadGEM BATS, and (**h**) HadGEM CLM averaged over the period 1980-2005.
